# Supplementary material for: Lipozyme 435-Mediated Synthesis of Xylose Oleate in Methyl Ethyl Ketone
Source: MDPI journal article supplement (doi:10.3390/molecules26113317), 2021-06-01
Supplement: s1 [file s1]

## **SUPPLEMENTARY MATERIAL**

### **Lipozyme 435-mediated synthesis of xylose oleate in methyl ethyl ketone**

**Maria Carolina Pereira Gonçalves, Jéssica Cristina Amaral, Roberto  
Fernandez-Lafuente, Ruy de Sousa Junior, Paulo Waldir Tardioli**

Corresponding authors: pwtardioli@ufscar.br (P.W.T.); rfl@icp.csic.es (R.F.-L.). Tel.: +55-16-3351-9362 (P.W.T.), +34-915854804 (R.F.-L.)

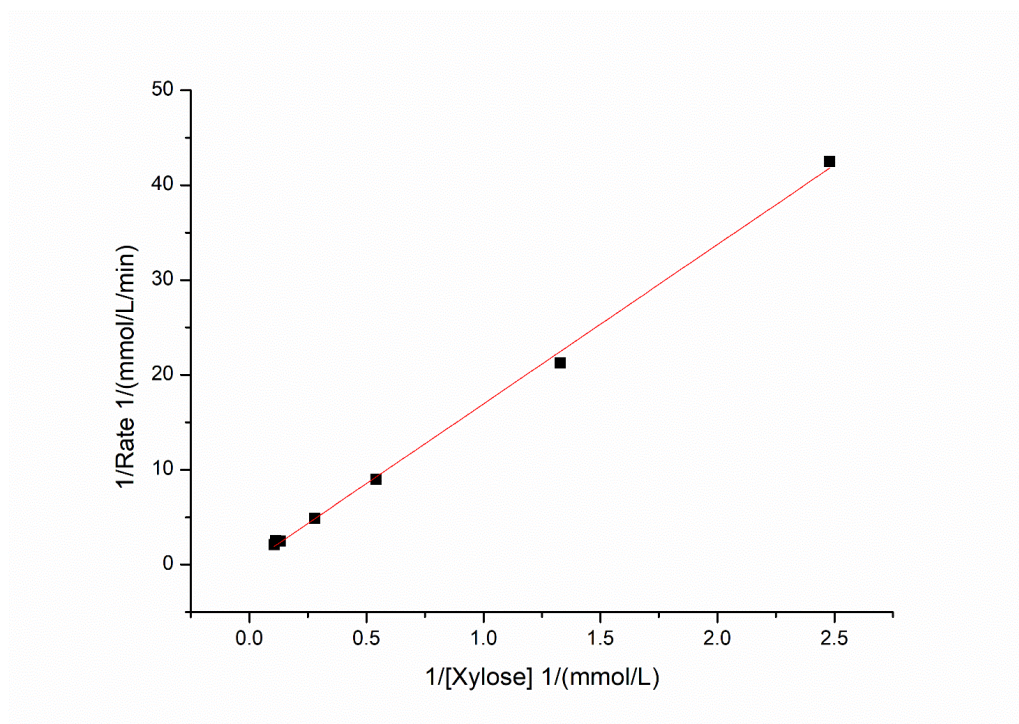

**Figure S1.** Lineweaver-Burk plot for the initial acylation rates of xylose with oleic acid catalyzed by Lipozyme 435. Reaction conditions: 1.4 mM oleic acid, 60 °C, 200 rpm, 15 min, enzyme load of 0.23% (w/v), with molecular sieves. The rates were calculated as percentage of xylose consumption.

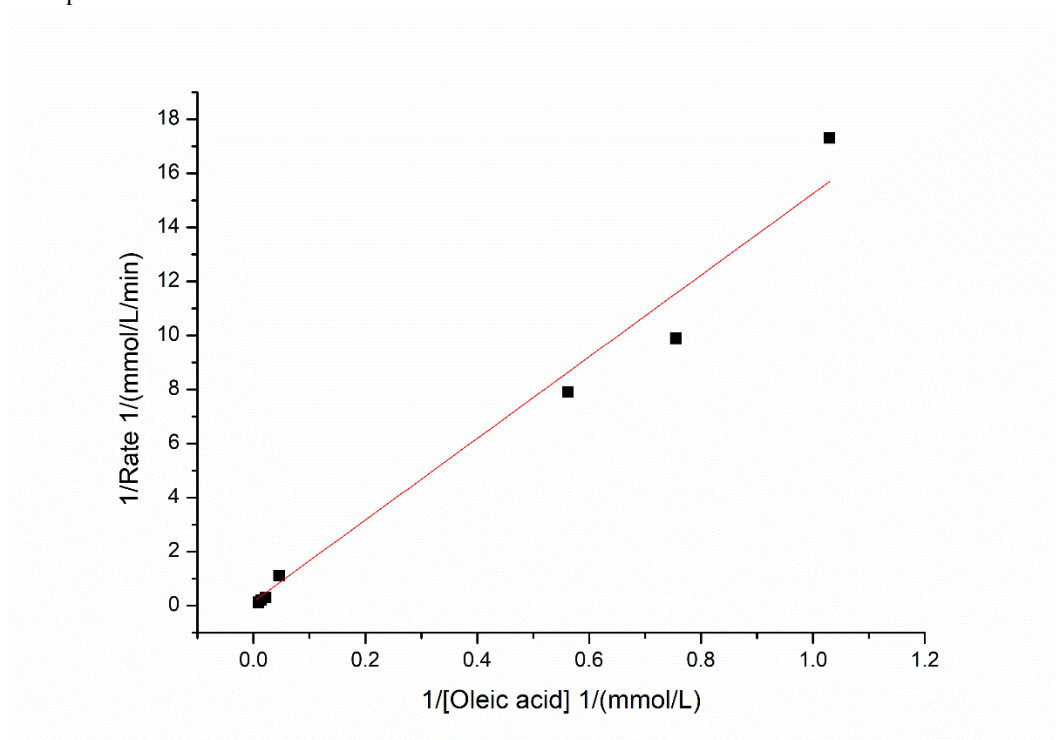

**Figure S2.** Lineweaver-Burk plot for the initial acylation rates of xylose with oleic acid catalyzed by Lipozyme 435. Reaction conditions: 7 mM xylose, 60 °C, 200 rpm, 15 min, enzyme load of 0.23% (w/v), with molecular sieves. The rates were calculated as percentage of oleic acid consumption.

**Table S1.** Kinetic constants of the esterification reaction catalyzed by Lipozyme 435. Reaction conditions: 15 min-reaction, 60 °C, 200 rpm, enzyme load of 0.23% (w/v), xylose: oleic acid molar ratio of 1:5, with molecular sieves.

| Parameters              |                 |
|-------------------------|-----------------|
| $V_{\max}$ (mmol/L/min) | $6.59 \pm 0.21$ |
| $K_m$ (xyl) (mmol/L)    | 97.22           |
| $K_m$ (OA) (mmol/L)     | 113.24          |

**Xylose monooleate  $C_{23}H_{42}O_6$**

**1:5 [M-H]<sup>-</sup>  $m/z$  413.2 EC 20V**

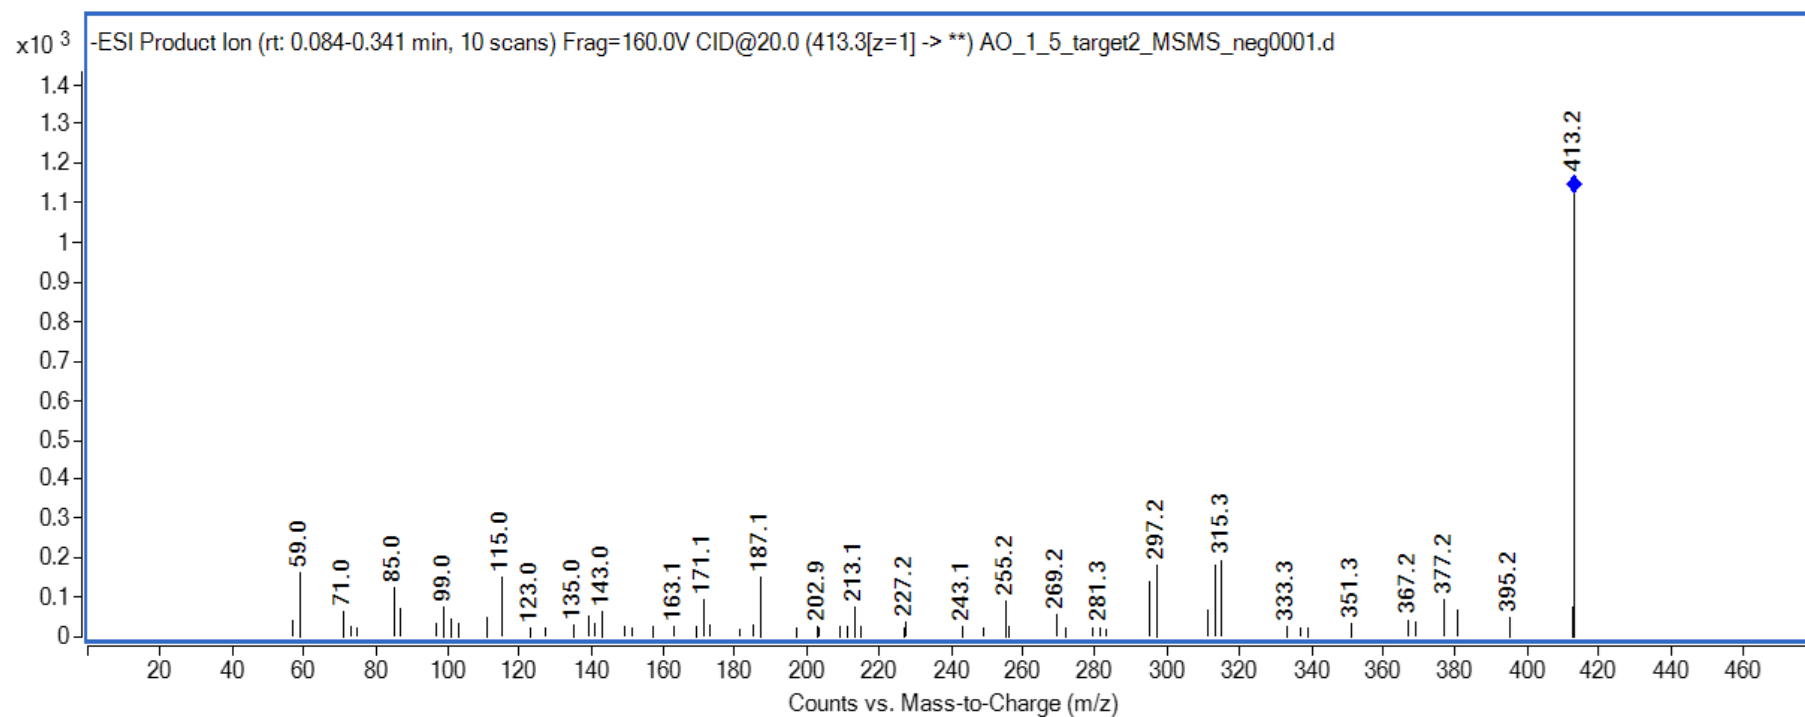

**Figure S3.** Mass spectrum of xylose monooleate with  $m/z = 413.2$ . Xylose: oleic acid molar ratio of 1:5.

**Xylose dioleate  $C_{41}H_{74}O_7$**

**1:5 [M-H]<sup>-</sup>  $m/z$  677.5 EC 22V**

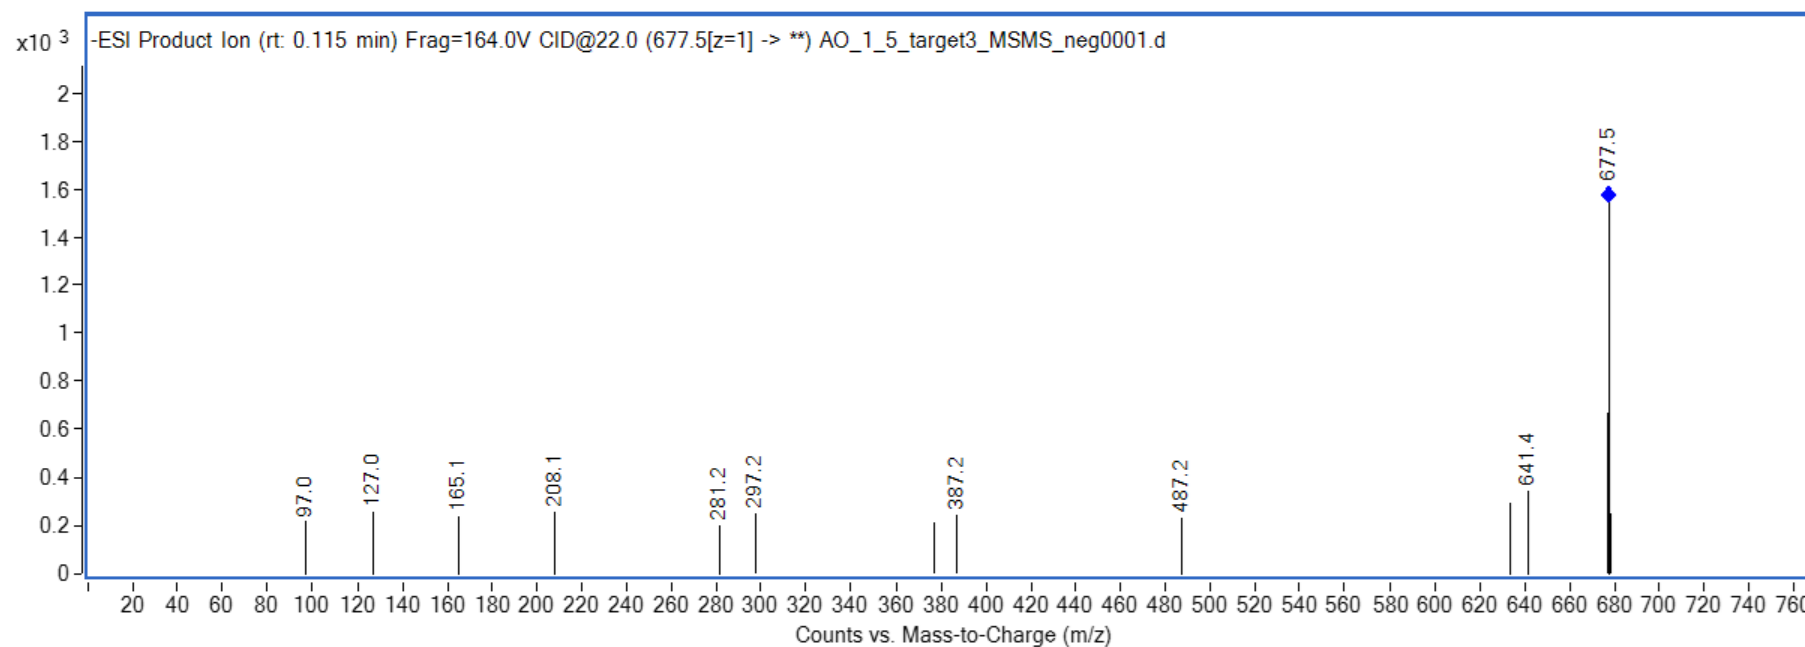

**Figure S4.** Mass spectrum of xylose dioleate with  $m/z = 677.5$ . Xylose: oleic acid molar ratio of 1:5.

**Xylose trioleate  $C_{59}H_{106}O_8$**

**1:5 [M-H]<sup>-</sup>  $m/z$  941.7 EC 20V**

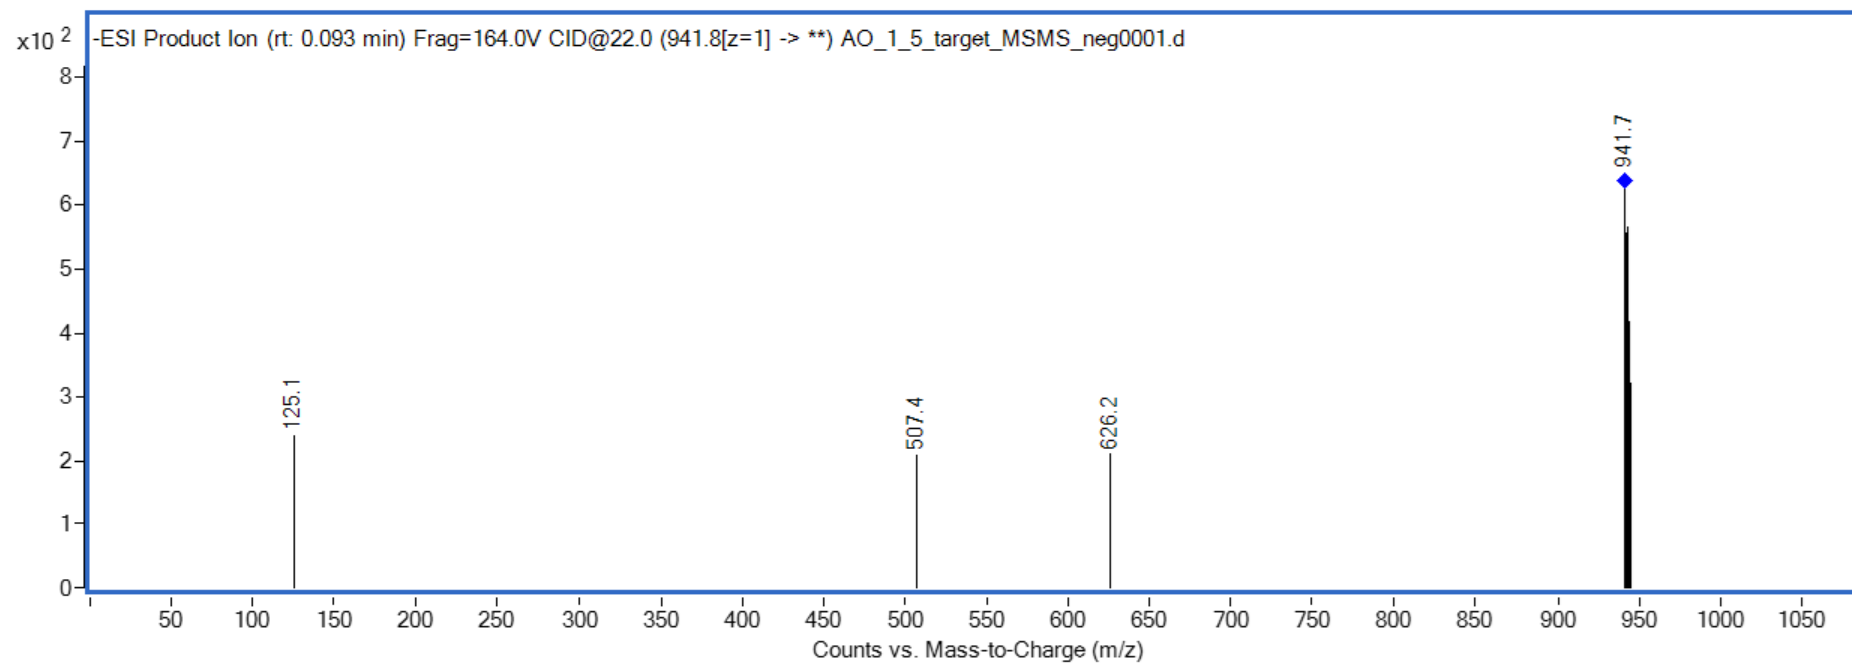

**Figure S5.** Mass spectrum of xylose trioleate with  $m/z = 941.7$ . Xylose: oleic acid molar ratio of 1:5.
